# Supplementary material for: Synthesis of fused 1,4-dihydropyridines as potential calcium channel blockers
Source: publisher site journal article supplement (doi:10.1515/tjb-2016-0247), 2017-06-11
Supplement: Supplementary file 1 [file tjb-2016-0247_suppl.docx]

**SUPPLEMENTARY MATERIAL**

In this part there are NMR spectra samples of some compounds’ that were provided by us. Only some representative NMR spectra of some compounds were included to prove that these compounds could be synthesized with these reactions.


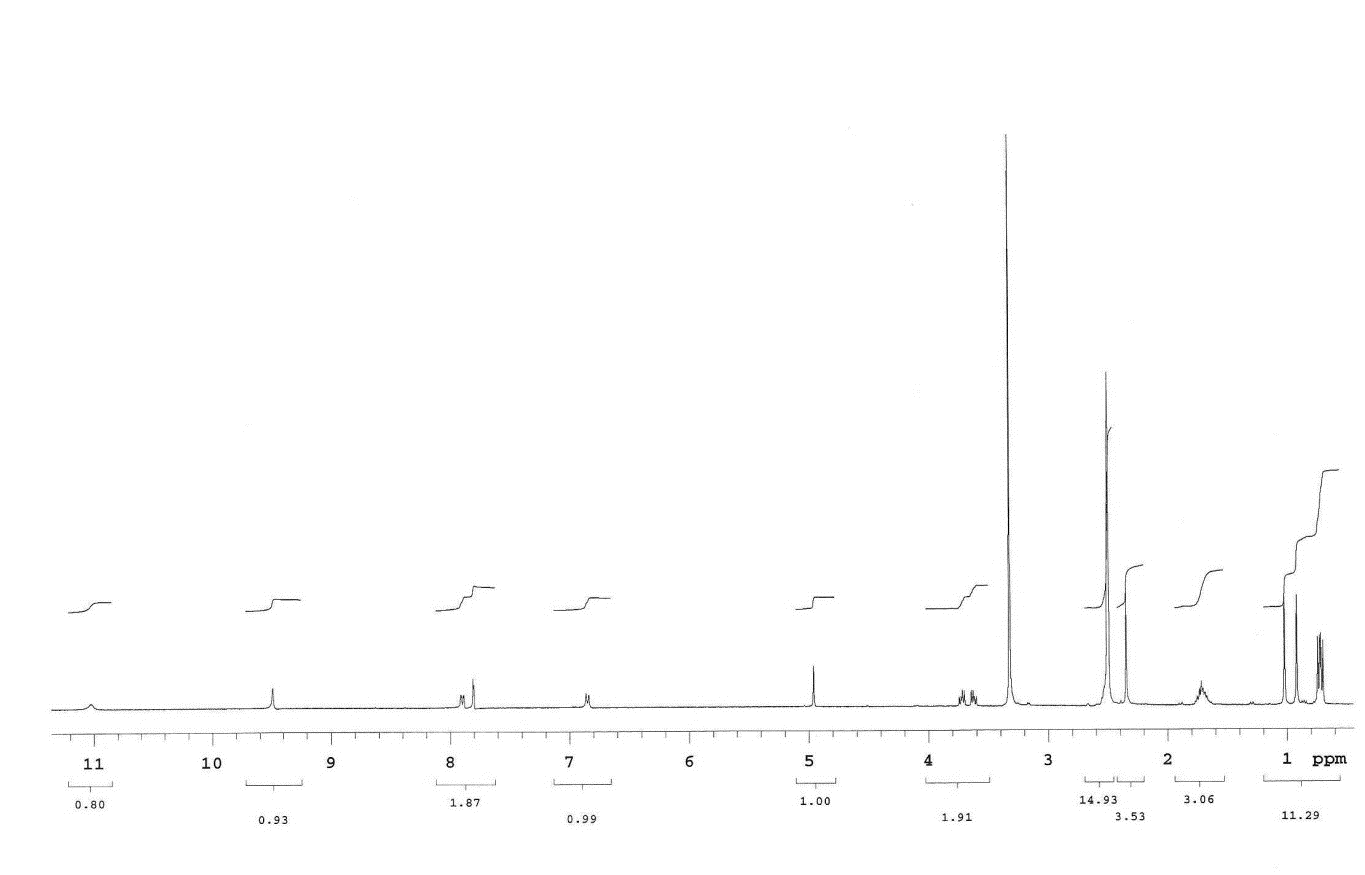


1H-NMR spectrum of compound **4**


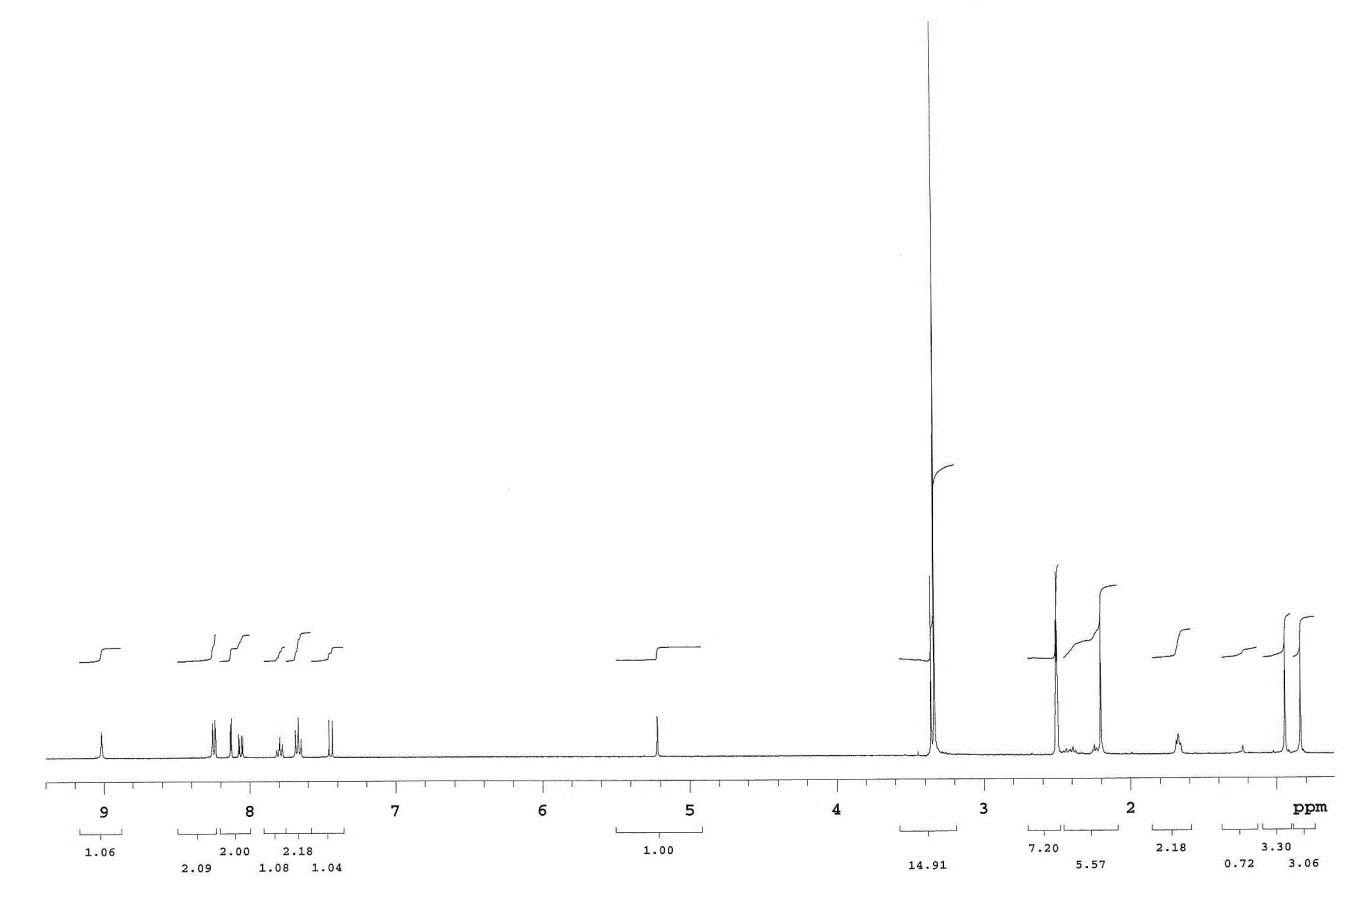


1H-NMR spectrum of compound **6**


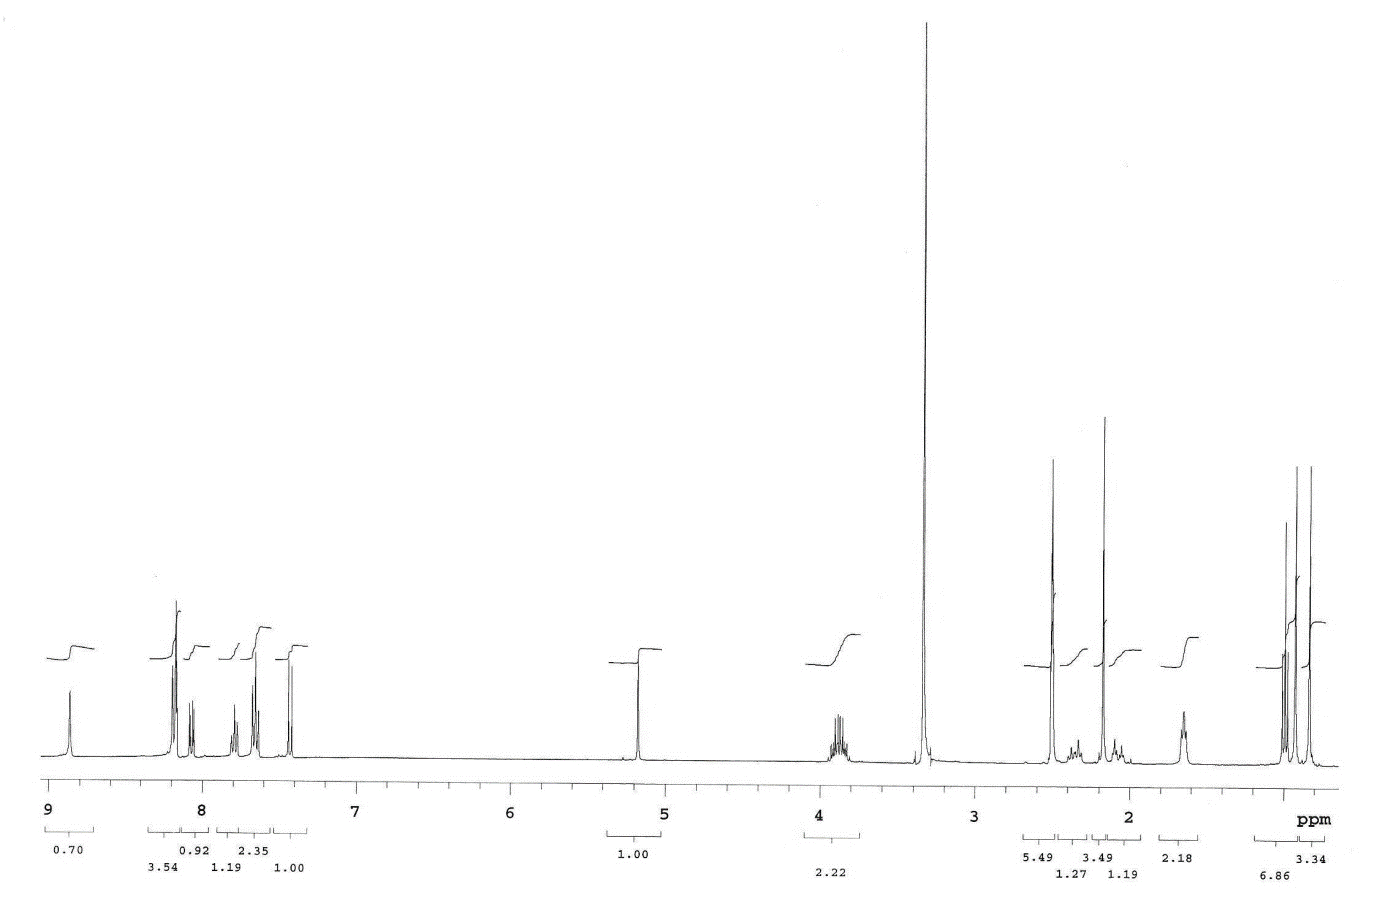


1H-NMR spectrum of compound **7**


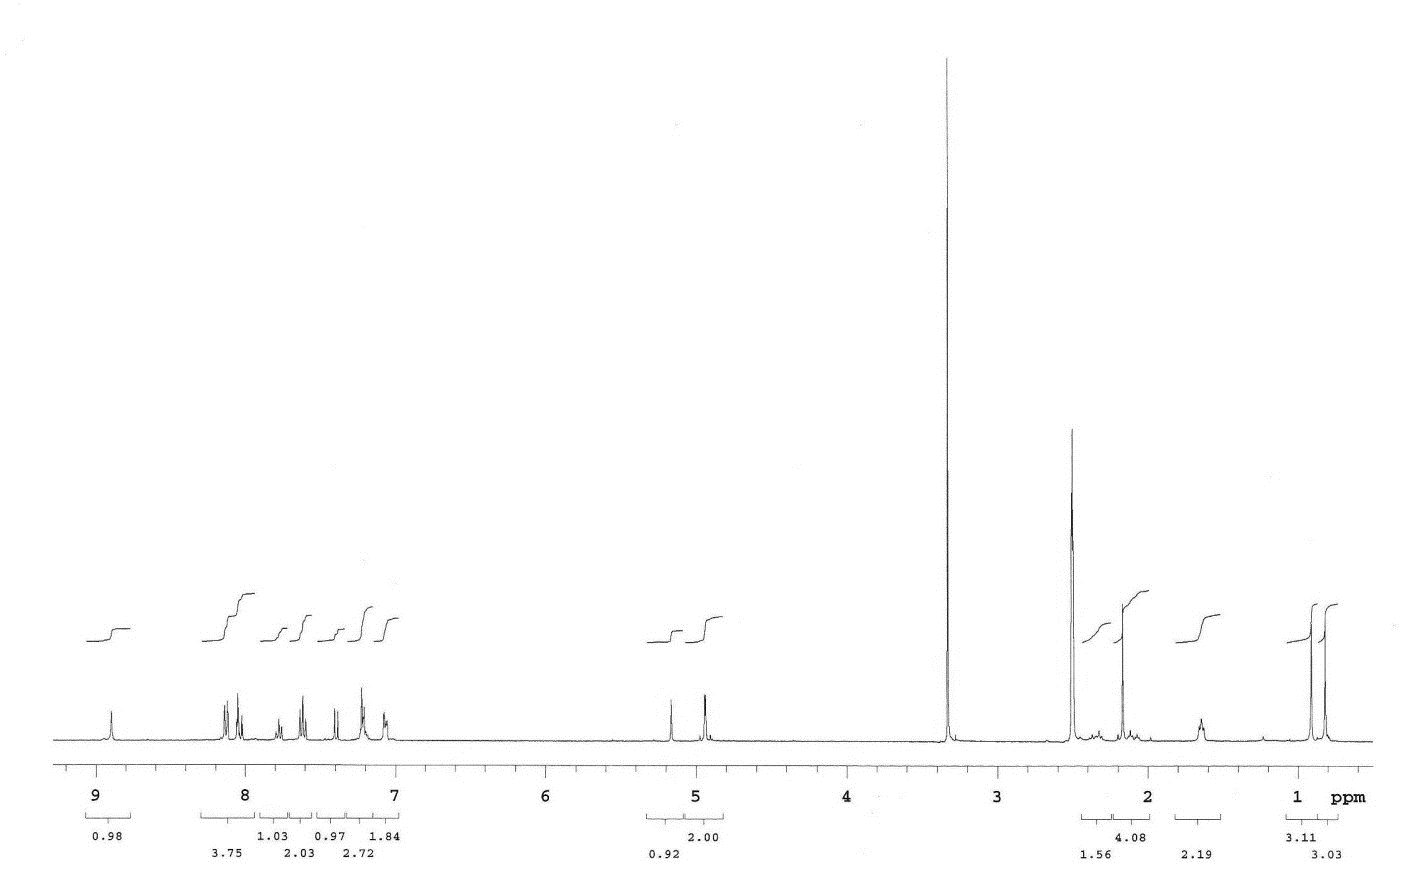


1H-NMR spectrum of compound **8**


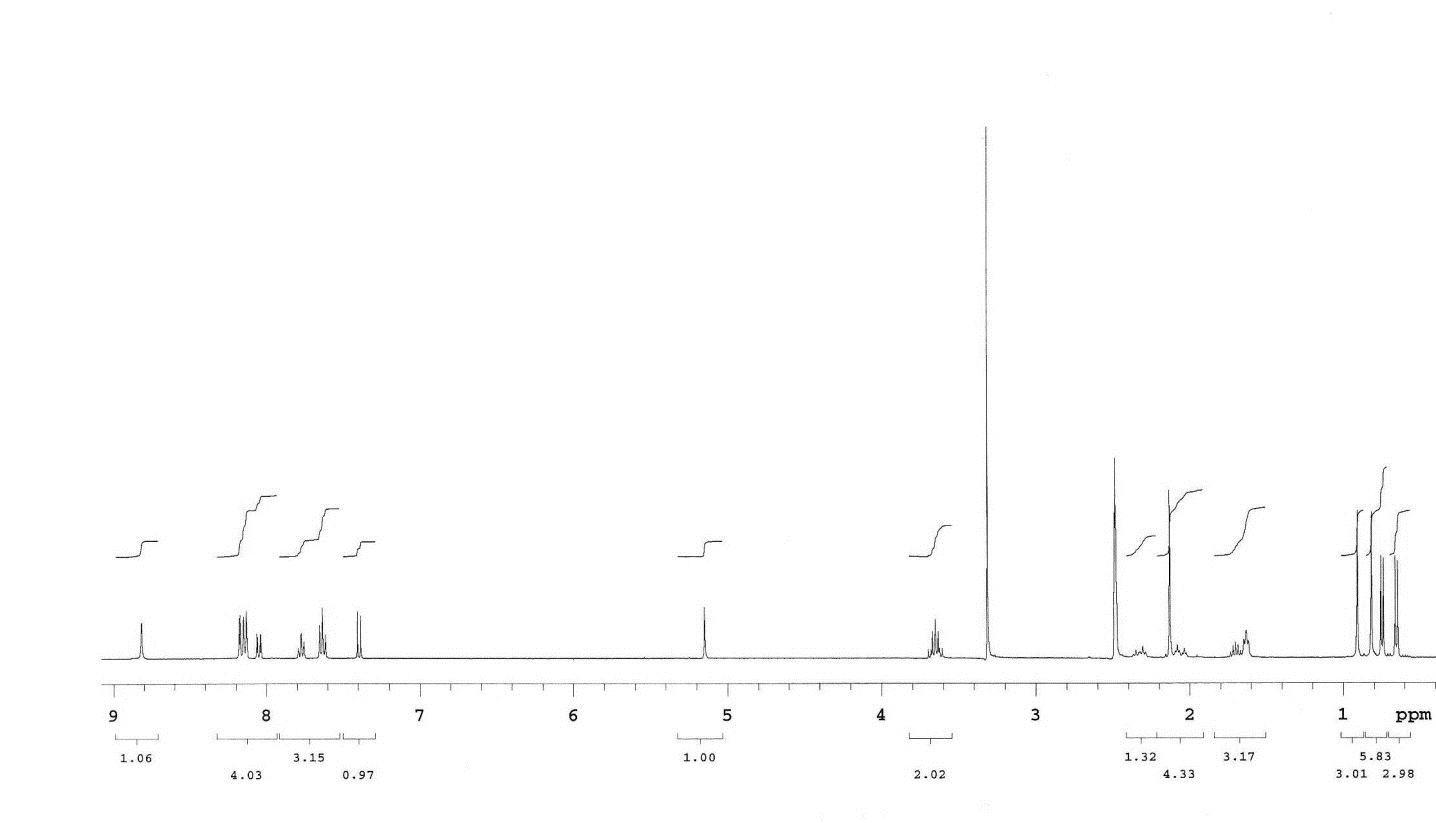


1H-NMR spectrum of compound **9**


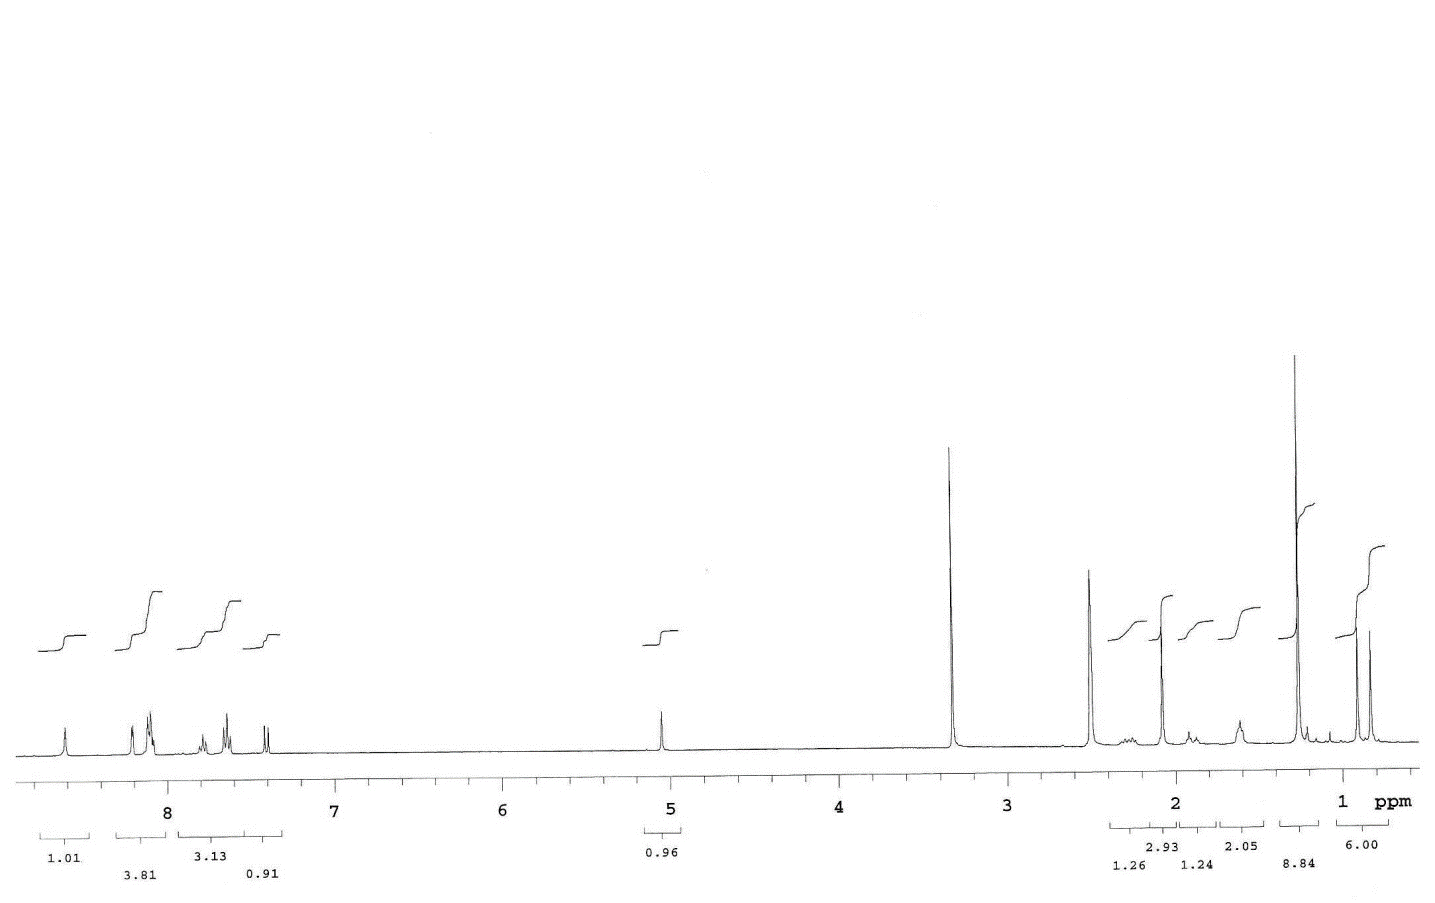


1H-NMR spectrum of compound **10**


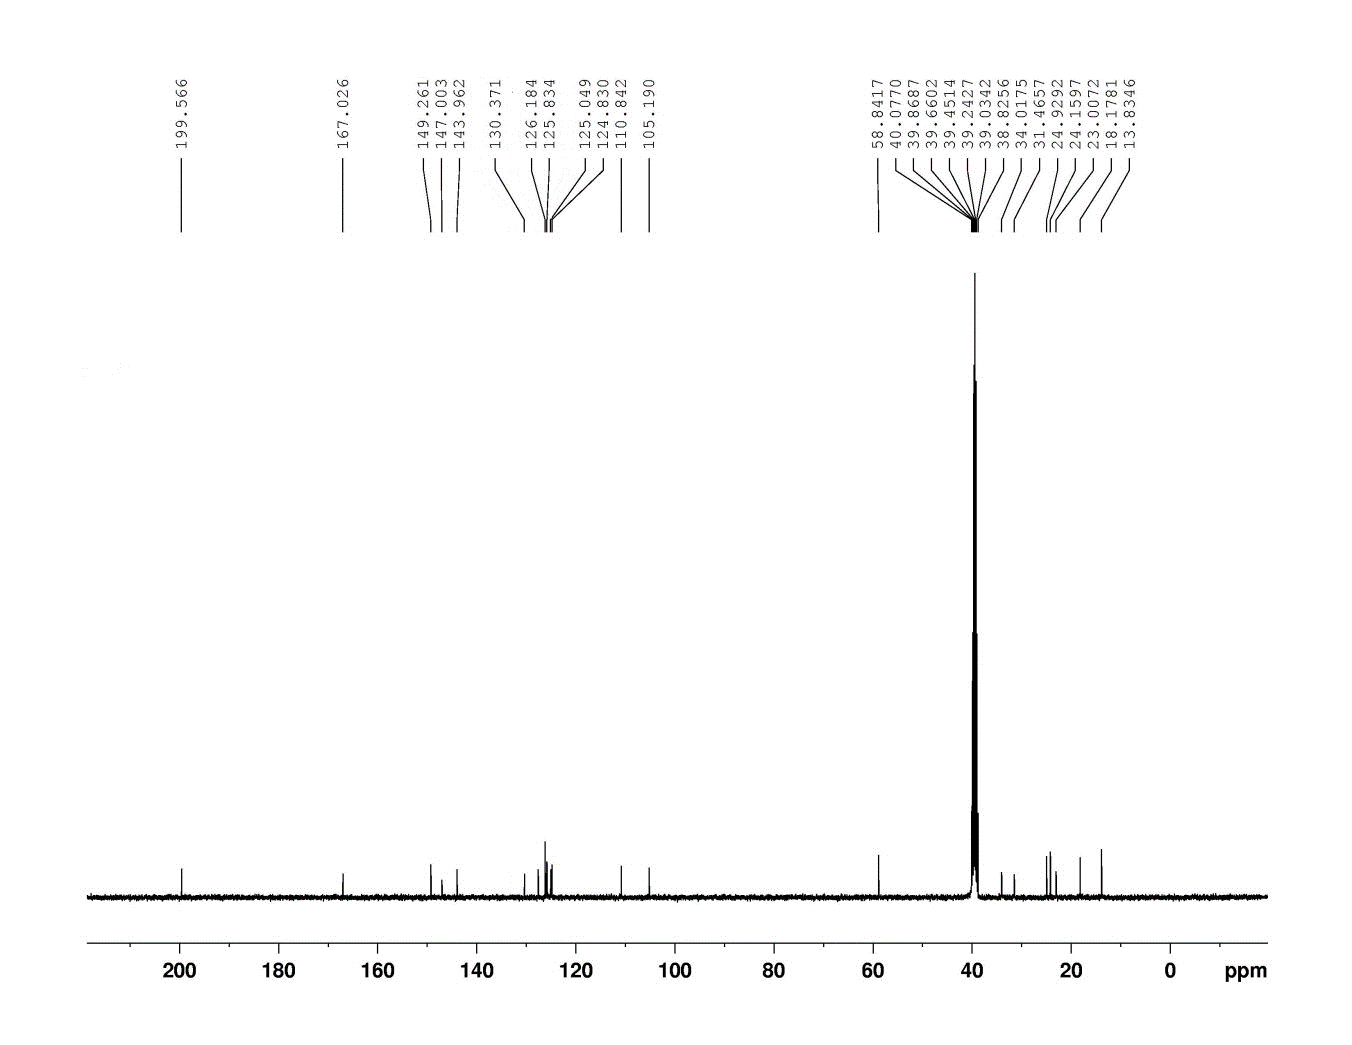


13C-NMR spectrum of compound **2**


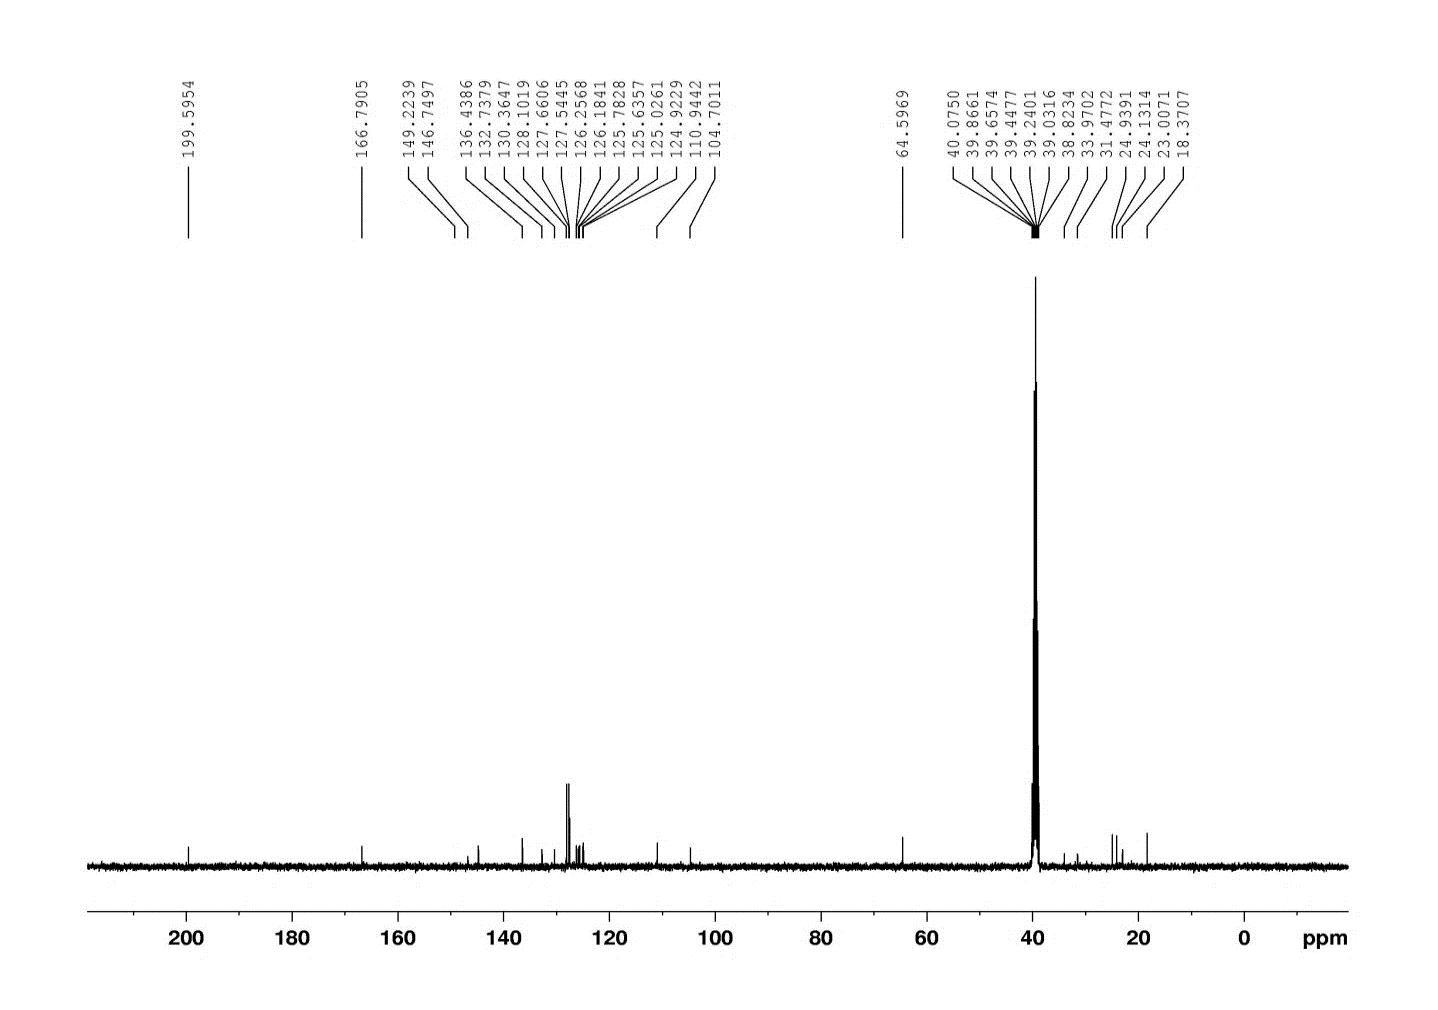


13C-NMR spectrum of compound **3**
